# Supplementary material
Source: HighWire-hosted journal article supplement (https://www.ajnr.org/highwire/filestream/52371/field_highwire_adjunct_files/0/3176_table.pdf)
Supplement: 3176_table.pdf [file 3176_table.pdf]

**On-line Table: Clinical and imaging characteristics in children presenting with isolated brain stem inflammation**

| No. | Age (yr) at Onset/Sex/Race | Clinical Presentation                                                                          | CSF                                                      | Initial MRI                        |     | Follow-Up MRI at 1 Year                     | Duration of Follow-Up (mo) | Clinical Outcome at Last Follow-Up                                                                  | Final Impression at Last Follow-Up                     |
|-----|----------------------------|------------------------------------------------------------------------------------------------|----------------------------------------------------------|------------------------------------|-----|---------------------------------------------|----------------------------|-----------------------------------------------------------------------------------------------------|--------------------------------------------------------|
|     |                            |                                                                                                |                                                          | Location                           | Gad |                                             |                            |                                                                                                     |                                                        |
| 1   | 13/F/AA                    | Left hemiparesis progressed to quadriparesis                                                   | Normal CSF, OCB-negative, IgG index normal               | Medulla at craniocervical junction | Yes | Improved, no new lesions                    | 12                         | Full recovery; being treated with immunosuppressive agents                                          | CNS lupus                                              |
| 2   | 7/M/C                      | Ataxia, dysarthria PMH; localized scleroderma diagnosed at 3 yr                                | WBC = 6/mm <sup>3</sup> , otherwise normal, OCB not done | Pons                               | No  | Stable with gliosis and atrophy             | 20                         | Partially improved with residual ataxia and dysarthria; being treated with immunosuppressive agents | CNS inflammation associated with localized scleroderma |
| 3   | 16/F/C                     | Right upper extremity paresthesias                                                             | Normal CSF, OCB-negative, IgG index normal               | Medulla                            | Yes | Complete resolution                         | 31                         | Full recovery                                                                                       | Monophasic demyelination; most likely ADEM             |
| 4   | 2/M/C                      | Weakness, swallowing difficulty, encephalopathy and respiratory distress (required intubation) | Normal CSF, OCB not done                                 | Medulla                            | No  | Complete resolution                         | 32                         | Full recovery                                                                                       | Monophasic demyelination; most likely ADEM             |
| 5   | 7/M/C                      | Irritability, dysarthria, emesis, intentional tremor                                           | Normal CSF, normal IgG index, OCB-negative               | Medulla                            | No  | Complete resolution                         | 38                         | Full recovery                                                                                       | Monophasic demyelination; most likely ADEM             |
| 6   | 5/F/C                      | Dizziness, ataxia, somnolence.                                                                 | Normal CSF, normal IgG index, OCB-negative               | Pons                               | No  | Cavitation/encephalomalacia in central pons | 62                         | Improved with mild dysarthria and mild coordination problems                                        | Undetermined; course remains monophasic                |

**Note:**—AA indicates African American; C, Caucasian; PMH, past medical history; Gad, gadolinium; WBC, white blood cell; OCB, oligoclonal bands; ANA, antinuclear antibody; IgG, immunoglobulin G; RNP, ribonucleoprotein; NMO-IgG Ab, neuromyelitis optica immunoglobulin antibody.
